# Supplementary material for: Development and Characterization of Bio-Based Composite Films for Food Packing Applications Using Boiled Rice Water and Pistacia vera Shells
Source: MDPI journal article supplement (doi:10.3390/polym15163456), 2023-08-18
Supplement: s1 [file s1]

# Development and Characterization of Bio-Based Composite Films for Food Packing Applications Using Boiled Rice Water and *Pistacia vera* Shells

Vinnarasi A. Raj <sup>1</sup>, Karthikumar Sankar <sup>1</sup>, Narayanasamy P. <sup>2</sup>, Ganesh Moorthy I. <sup>3</sup>, Sivakumar N. <sup>4</sup>, Shyam Kumar Rajaram <sup>1,\*</sup>, Ponmurugan Karuppiyah <sup>5</sup>, Mohammed Rafi Shaik <sup>6</sup>, Abdulrahman Alwarthan <sup>6</sup>, Tae Hwan Oh <sup>7</sup> and Baji Shaik <sup>7,\*</sup>

<sup>1</sup> Department of Biotechnology, Kamaraj College of Engineering and Technology, K. Vellakulam, Virudhunagar 625701, Tamil Nadu, India; vinstarlion@gmail.com (V.A.R.); skarthikumar@gmail.com (K.S.)

<sup>2</sup> Department of Mechanical Engineering, Kamaraj College of Engineering and Technology, K. Vellakulam, Virudhunagar 625701, Tamil Nadu, India; narayanx5@gmail.com

<sup>3</sup> School of Chemical Engineering, Vellore Institute of Technology, Vellore 632014, Tamil Nadu, India; igmoorthy@yahoo.co.in

<sup>4</sup> Department of Molecular Microbiology, School of Life Sciences, Madurai Kamaraj University, Madurai 625021, Tamil Nadu, India; microshivaak@gmail.com

<sup>5</sup> Department of Botany and Microbiology, College of Science, King Saud University, P.O. Box 2455, Riyadh 11451, Saudi Arabia; pkaruppiyah@ksu.edu.sa

<sup>6</sup> Department of Chemistry, College of Science, King Saud University, P.O. Box 2455, Riyadh 11451, Saudi Arabia; mrshaik@ksu.edu.sa (M.R.S.); awarthan@ksu.edu.sa (A.A.)

<sup>7</sup> School of Chemical Engineering, Yeungnam University, Gyeongsan 38541, Republic of Korea; taehwanoh@ynu.ac.kr

\* Correspondence: kingshyam2003@gmail.com (S.K.R.); shaikbaji@yu.ac.kr (B.S.)

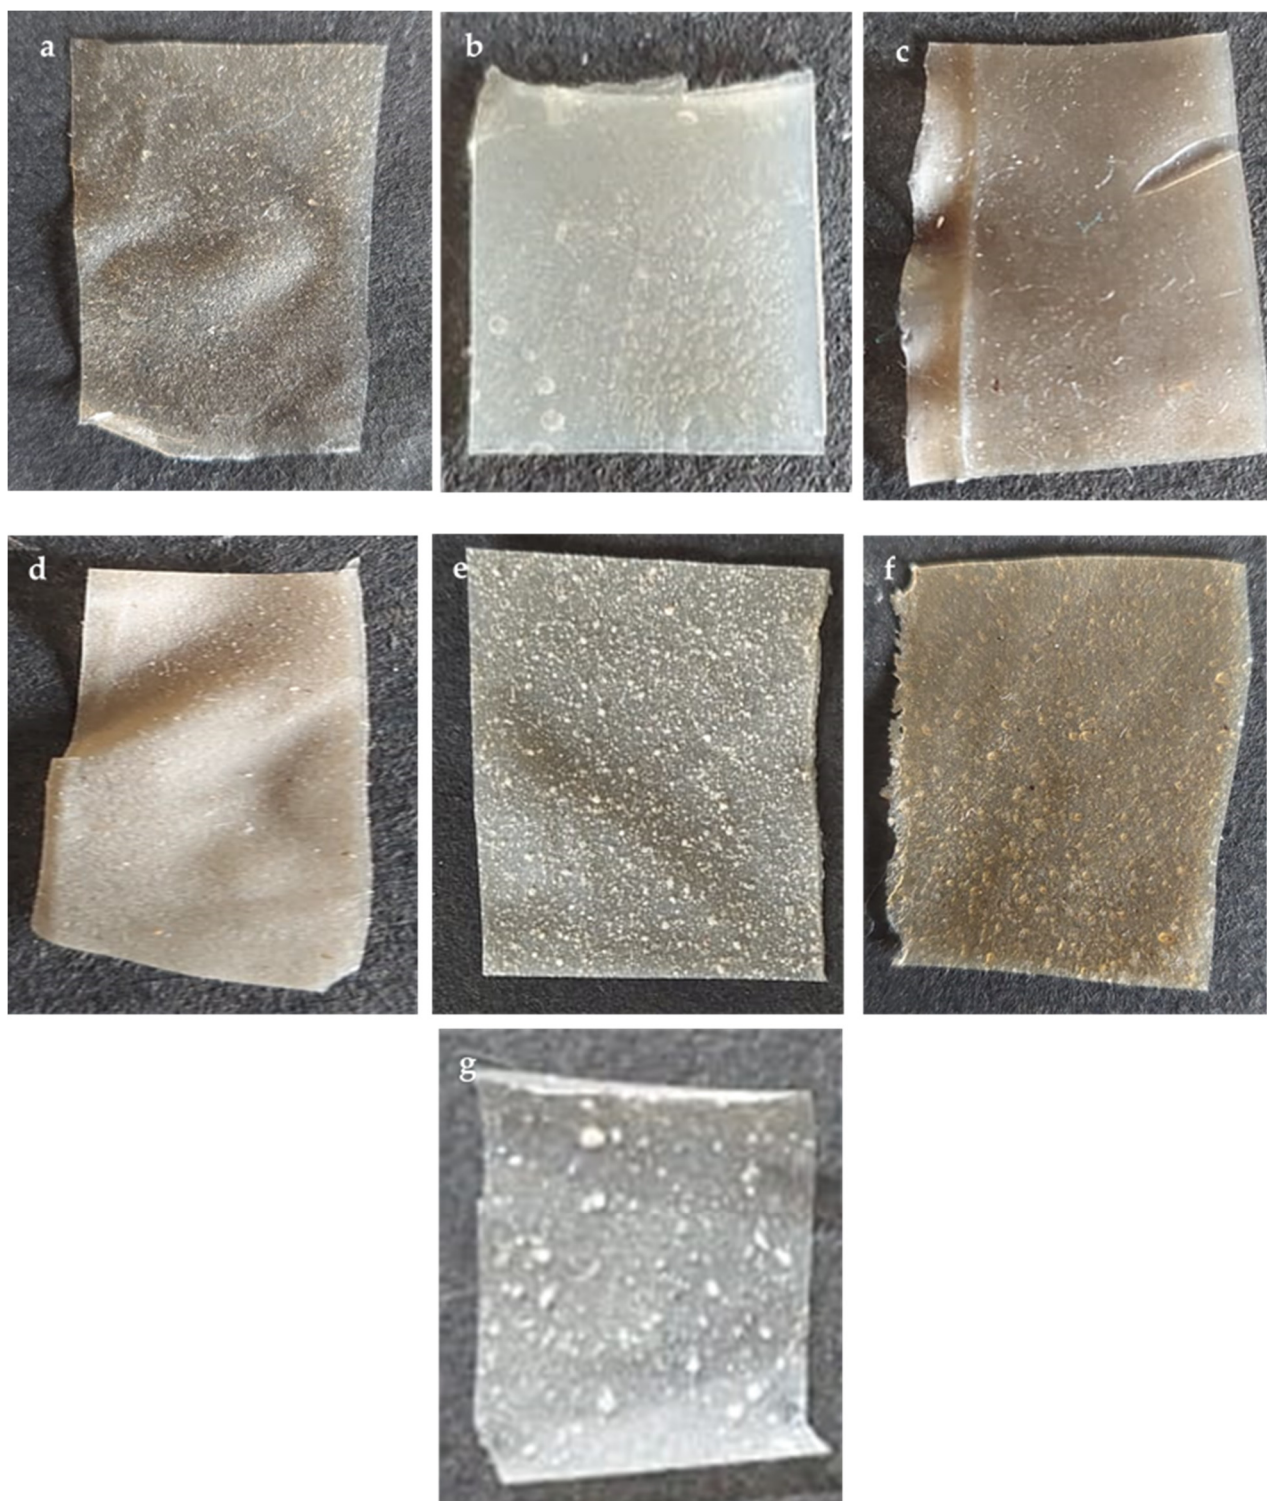

**Figure S1.** Diverse bio-composite film from different stabilizing agents; a) Agar+corn, b) Alginate+corn, c) Alginate+Gum, d) Agar+Gum, e) Agar+ Pistacia shell, f) Alginate+ Pistacia shell, g) Agar+ Pistacia shell shell+corn.
